# Supplementary material for: Influences of Ecological Restoration Programs on Ecosystem Services in Sandy Areas, Northern China
Source: MDPI journal article supplement (doi:10.3390/rs15143519), 2023-07-12
Supplement: s1 [file s1]

Archive with 1 entries (1 files):
- remotesensing-2433480-SI.pdf
