# Supplementary material for: Influences of Ecological Restoration Programs on Ecosystem Services in Sandy Areas, Northern China
Source: MDPI journal article supplement (doi:10.3390/rs15143519), 2023-07-12
Supplement: s1 [file s1 › remotesensing-2433480-SI.pdf]

---

# Influences of Ecological Restoration Programs on Ecosystem Services in Sandy Areas, Northern China

(Supplementary material for online publication only)

## 1. Supplementary Information

**Table S1.** Descriptions of parameters for the Revised Universal Soil Loss Equation (RUSLE).

| Parameters                                      | Calculation Methods                                                                                                                                                                                                                                                                                                                             | Descriptions of Input Parameters                                                                                                                                                                                         |
|-------------------------------------------------|-------------------------------------------------------------------------------------------------------------------------------------------------------------------------------------------------------------------------------------------------------------------------------------------------------------------------------------------------|--------------------------------------------------------------------------------------------------------------------------------------------------------------------------------------------------------------------------|
| rainfall-runoff erosivity factor ( <i>R</i> )   | $R = \sum_{i=1}^{12} 1.735 \times 10^{[1.5 \times \log_{10}(p_i^2/p) - 0.08188]}$                                                                                                                                                                                                                                                               | Where <i>i</i> represents the month in a year; <i>P<sub>i</sub></i> is the precipitation in month <i>i</i> ; <i>P</i> is the total annual precipitation.                                                                 |
| soil erodibility factor ( <i>K</i> )            | $K = \left\{ 0.2 + 0.3 \exp \left[ -0.0256 S_a \left( 1 - \frac{S_i}{100} \right) \right] \right\} \times \left( \frac{S_i}{C_l + S_i} \right)^{0.3} \\ \times \left[ 1 - \frac{0.25C}{C + \exp(3.72 - 2.95C)} \right] \\ \times \left[ 1 - \frac{0.7(1 - 0.01S_a)}{S_n + \exp(-5.51 + 22.9S_n)} \right]$                                       | Where <i>S<sub>a</sub></i> , <i>S<sub>i</sub></i> , <i>C<sub>l</sub></i> and <i>C</i> are the mass percentages of sand (0.02–2 mm), silt (0.002–0.02 mm), clay (<0.002 mm) and organic carbon in the soil, respectively. |
| Slope length and steepness factor ( <i>LS</i> ) | $L = (\lambda / 22.13)^{[\beta / (\beta + 1)]}$<br>$\beta = (\sin \theta / 0.0896) / [3 \times (\sin \theta)^{0.8} + 0.56]$<br>$S = \begin{cases} 10.8 \times \sin \theta + 0.03, & \theta < 9^\circ \\ 16.8 \times \sin \theta - 0.5, & 9^\circ \leq \theta < 18^\circ \\ 21.91 \times \sin \theta - 0.96, & \theta \geq 18^\circ \end{cases}$ | Where <i>λ</i> is the slope length and <i>θ</i> is the inclination angle.                                                                                                                                                |
| Cover management ( <i>C</i> )                   | $C = \begin{cases} 1, & fvc = 0 \\ 0.6508 - 0.3436 \times \log_{10} fvc, & 0 \leq fvc \leq 78.3\% \\ 0, & fvc > 78.3\% \end{cases}$                                                                                                                                                                                                             | where <i>fvc</i> is the vegetation cover.                                                                                                                                                                                |
| Support practice factor ( <i>P</i> )            | <i>P</i> values were assigned following the approaches proposed by Teng et al. [1], Ma et al. [2].                                                                                                                                                                                                                                              | <i>P</i> is a dimensionless conservation practice factor.                                                                                                                                                                |

**Table S2.** Descriptions of parameters for the revised wind erosion equation (RWEQ).

| Parameters                                                           | Calculation Methods                                                                                                                                                                                                              | Descriptions of Input Parameters                                                                                                                                                                                                                                                                                                                                                                                                                                                                                                                                                                                                                                                                                                                                                                          |
|----------------------------------------------------------------------|----------------------------------------------------------------------------------------------------------------------------------------------------------------------------------------------------------------------------------|-----------------------------------------------------------------------------------------------------------------------------------------------------------------------------------------------------------------------------------------------------------------------------------------------------------------------------------------------------------------------------------------------------------------------------------------------------------------------------------------------------------------------------------------------------------------------------------------------------------------------------------------------------------------------------------------------------------------------------------------------------------------------------------------------------------|
| Weather factor ( <i>WF</i> )                                         | $WF = \frac{SW \times SD \times \sum_{i=1}^N u_2(u_2 - u_t) \times N_d \times \rho}{Ng}$ $\rho = \frac{1}{T}(1.013 - 0.1183EL + 0.0048EL^2)$ $SW = \frac{PET - (R + I) \left( \frac{R_d}{N_d} \right)}{PET}$ $SD = 1 - P_{snow}$ | Where $W_f$ is the wind factor ( $\text{m}^3 \text{s}^{-3}$ ); $\rho$ is air density ( $\text{kg m}^{-3}$ ); $g$ is acceleration due to gravity ( $\text{m s}^{-2}$ ); $SW$ is the soil wetness factor; $SD$ is the snow cover factor; $U_2$ is the wind speed at a height of 2 m ( $\text{m s}^{-1}$ ); $U_t$ is the threshold wind speed at a height of 2 m ( $\text{m s}^{-1}$ ); $N_d$ is the number of days in the period (usually 15 to 16 days); $N$ is the number of wind speed observations; $PET$ is potential evapotranspiration (mm); $EL$ is elevation (km) obtained from DEM; $T$ is absolute temperature (degrees Kelvin); $R + I$ is rainfall plus irrigation (mm); $R_d$ is the number of rainfall and/or irrigation days; $P_{snow}$ is probability of snow depth greater than 25.4 mm. |
| Erodible fraction ( <i>EF</i> );<br>Soil crust factor ( <i>SCF</i> ) | $EF = \frac{29.09 + 0.31Sa + 0.17Si + 0.33Sa/Cl - 2.59OM - 0.95CaCO_3}{100}$ $SCF = \frac{1}{1 + 0.0066Cl^2 + 0.021OM^2}$                                                                                                        | Where $Sa$ is the sand content (%); $Si$ is the silt content (%); $Sa/Cl$ is the ratio of sand to clay; $OM$ is the organic matter (%); $CaCO_3$ is the calcium carbonate (%).                                                                                                                                                                                                                                                                                                                                                                                                                                                                                                                                                                                                                            |
| Soil roughness factor ( <i>K</i> )                                   | $K' = e(1.86K_{rmod} - 2.41K_{rmod}^{0.934} - 0.124C_{rr})$ $K_r = \frac{RH^2}{RS}$ $R_c = 1 - 0.00032A - 0.000349A^2 + 0.0000258A^3$                                                                                            | Where $K_{rmod}$ is a modified roughness factor which is the product of the ridge roughness $K_r$ and the rotation coefficient $R_c$ ; where $RH$ and $RS$ are the height and spacing respectively of ridges in the arable lands (cm); where $A$ is the wind angle to the ridges ( $0^\circ$ if perpendicular, $90^\circ$ if parallel).                                                                                                                                                                                                                                                                                                                                                                                                                                                                   |
| Combined vegetation factor<br>( <i>COG</i> )                         | $SLR_s = e^{-0.0344SA^{0.6413}}$ $SLR_c = e^{-5.614CC^{0.7366}}$                                                                                                                                                                 | $SA$ is the silhouette area computed by multiplying the number of standing stalks in $1 \text{ m}^2$ times average diameter (cm) times stalk height (cm); $CC$ is the growing vegetation cover, calculated by remote sensing data.                                                                                                                                                                                                                                                                                                                                                                                                                                                                                                                                                                        |

**Table S3.** Descriptions of parameters for the Carnegie-Ames-Stanford approach (CASA) model.

| Parameters    | Calculation Methods                                                                                                                                                                                 | Descriptions of Input Parameters                                                                                                                                                                                                                                                                                                                           |
|---------------|-----------------------------------------------------------------------------------------------------------------------------------------------------------------------------------------------------|------------------------------------------------------------------------------------------------------------------------------------------------------------------------------------------------------------------------------------------------------------------------------------------------------------------------------------------------------------|
| $APAR$        | $APAR(x, t) = SOL(x, t) \times FPAR(x, t) \times 0.5$ $FPAR(x, t) = \frac{SR - SR_{i,min}}{SR_{i,max} - SR_{i,min}} \times (FPAR_{max} - FPAR_{min}) + FPAR_{min}$ $SR = \frac{1 + NDVI}{1 - NDVI}$ | $SOL$ is total solar radiation, $FPAR$ is the proportion of absorbed solar radiation.                                                                                                                                                                                                                                                                      |
| $\varepsilon$ | $\varepsilon = T_{\varepsilon1} \times T_{\varepsilon2} \times \omega_{\varepsilon} \times \varepsilon_{max}$                                                                                       | where $\varepsilon_{max}$ is the maximal LUE, and the default set of $\varepsilon_{max}$ in the CASA model is assigned to a constant value of $0.389 \text{ gC}\cdot\text{MJ}^{-1}$ , $T_{\varepsilon1}$ and $T_{\varepsilon2}$ represent the stress effects of temperature upon the LUE, and $W_{\varepsilon}$ is the water stress influence coefficient. |

Table S4. Descriptions of parameters for the Water yield model.

| Parameters            | Calculation Methods                                                                                                               | Descriptions of Input Parameters                                                                                                                                                                                               |
|-----------------------|-----------------------------------------------------------------------------------------------------------------------------------|--------------------------------------------------------------------------------------------------------------------------------------------------------------------------------------------------------------------------------|
| $\frac{AET(x)}{P(x)}$ | $\frac{AET(x)}{P(x)} = 1 + \frac{PET(x)}{P(x)} - \left[ 1 + \left( \frac{PET(x)}{P(x)} \right)^\omega \right]^{\frac{1}{\omega}}$ | where $P$ is the annual precipitation, $AET$ is the actual evapotranspiration, $PET$ is the potential evapotranspiration (mm), and $\omega$ is a nonphysical parameter that characterizes the natural climate–soil properties. |
| $PET(x)$              | $PET(x) = K_c(t_x) \times ET_0(x)$                                                                                                | where $k$ is the evapotranspiration coefficient for each vegetation type, where $ET_0$ is the reference evapotranspiration.                                                                                                    |
| $\omega(x)$           | $\omega(x) = Z \times \frac{AWC(x)}{P(x)} + 1.25$                                                                                 | where $Z$ is an empirical factor.                                                                                                                                                                                              |

Table S5. Comparison of simulated.

| Variables            | Source           | Region         | Value                                        | Source     | Region         | Value                                        |
|----------------------|------------------|----------------|----------------------------------------------|------------|----------------|----------------------------------------------|
| Carbon sequestration | MOD17A3          | TNR            | 192.5 (gC m <sup>-2</sup> yr <sup>-1</sup> ) | This study | TNR            | 167.6 (gC m <sup>-2</sup> yr <sup>-1</sup> ) |
| Wind erosion         | Zhang et al. [3] | Inner Mongolia | 3800 (t km <sup>-2</sup> yr <sup>-1</sup> )  | This study | Inner Mongolia | 4279 (t km <sup>-2</sup> yr <sup>-1</sup> )  |
| Soil conservation    | Li et al. [4]    | TNR            | 5656 (t km <sup>-2</sup> yr <sup>-1</sup> )  | This study | TNR            | 4800 (t km <sup>-2</sup> yr <sup>-1</sup> )  |
| Water yield          | Li et al. [5]    | YERB           | 200 (mm yr <sup>-1</sup> )                   | This study | TERB           | 239 (mm yr <sup>-1</sup> )                   |

TNR, Three Northern Protected Forests Program; YERB, Yellow River Basin.

## References

1. Teng, H.; Liang, Z.; Chen, S.; Liu, Y.; Rossel, R.A.V.; Chappell, A.; Yu, W.; Shi, Z. Current and future assessments of soil erosion by water on the Tibetan Plateau based on RUSLE and CMIP5 climate models. *Sci. Total Environ.* **2018**, *635*, 673–686.
2. Ma, X.; Zhu, J.; Yan, W.; Zhao, C. Assessment of soil conservation services of four river basins in Central Asia under global warming scenarios. *Geoderma* **2020**, *375*, 114533.
3. Zhang, H.; Fan, J.; Cao, W.; Harris, W.; Li, Y.; Chi, W.; Wang, S. Response of wind erosion dynamics to climate change and human activity in Inner Mongolia, China during 1990 to 2015. *Sci. Total Environ.* **2018**, *639*, 1038–1050.
4. Li, J.; He, H.; Zeng, Q.; Chen, L.; Sun, R. A Chinese soil conservation dataset preventing soil water erosion from 1992 to 2019. *Sci. Data* **2023**, *10*, 319.
5. Li, Y.; Chen, P.; Niu, Y.; Liang, Y.; Wei, T. Dynamics and attributions of ecosystem water yields in China from 2001 to 2020. *Ecol. Indic.* **2022**, *143*, 109373.

**Disclaimer/Publisher's Note:** The statements, opinions and data contained in all publications are solely those of the individual author(s) and contributor(s) and not of MDPI and/or the editor(s). MDPI and/or the editor(s) disclaim responsibility for any injury to people or property resulting from any ideas, methods, instructions or products referred to in the content.
